# Supplementary material for: Characterizing Y224 conformational flexibility in FtmOx1-catalysis using 19F NMR spectroscopy
Source: PubMed Central journal article supplement — Catal Sci Technol. 2024 Nov 20;15(2):386–95. doi: 10.1039/d4cy01077a (PMC11629144; doi:10.1039/d4cy01077a), 2024-11-20
Supplement: CY-OLF-D4CY01077A-s001.pdf [file CY-OLF-D4CY01077A-s001.pdf]

## SUPPORTING INFORMATION

---

### Supporting Information

#### Characterizing Y224 conformational flexibility in FtmOx1-catalysis using $^{19}\text{F}$ NMR spectroscopy

Xinye Wang,<sup>†a</sup> Lingyun Yang,<sup>‡b</sup> Shenlin Wang,<sup>a</sup> Jun Wang,<sup>c</sup> Kelin Li,<sup>d</sup> Nathchar Naowarojna,<sup>e</sup> Yi Ju,<sup>a</sup> Ke Ye,<sup>a</sup> Yuchen Han,<sup>a</sup> Wupeng Yan,<sup>c\*</sup> Xueting Liu,<sup>a\*</sup> Lixin Zhang,<sup>a\*</sup> Pinghua Liu<sup>d\*</sup>

---

<sup>a.</sup> State Key Laboratory of Bioreactor Engineering, East China University of Science and Technology, Shanghai 200237, China. E-mail: liuxueting@ecust.edu.cn; lizhang@ecust.edu.cn

<sup>b.</sup> iHuman Institute, ShanghaiTech University, Shanghai 201210, China.

<sup>c.</sup> School of Life Sciences and Biotechnology, Shanghai Jiao Tong University, Shanghai 200240, China. E-mail: yanwupeng@sjtu.edu.cn

<sup>d.</sup> Department of Chemistry, Boston University, Boston, Massachusetts 02215, United States. E-mail: pinghua@bu.edu

<sup>e.</sup> Program of Chemistry, Faculty of Science and Technology, Sakon Nakhon Rajabhat University, Sakon Nakhon 47000, Thailand

## Table of Contents

|                                                                                                                                                                                                                                                                                               |   |
|-----------------------------------------------------------------------------------------------------------------------------------------------------------------------------------------------------------------------------------------------------------------------------------------------|---|
| Table of Contents .....                                                                                                                                                                                                                                                                       | 2 |
| Supplementary Figures .....                                                                                                                                                                                                                                                                   | 3 |
| <b>Figure S1.</b> $^{19}\text{F}$ NMR studies on F <sub>2</sub> Y224-FtmOx1 complexed with different metal ions. ....                                                                                                                                                                         | 3 |
| <b>Figure S2.</b> CD spectrum of F <sub>2</sub> Y224-FtmOx1 apo protein (black), F <sub>2</sub> Y224-FtmOx1•Fe(II) (red), and F <sub>2</sub> Y224-FtmOx1•Zn(II) (green). ....                                                                                                                 | 3 |
| <b>Figure S3.</b> Binary structure of FtmOx1•Fe <sup>II</sup> • $\alpha$ KG (pdb entry 4Y5S) complex. The distances between Y224 and two oxygen atoms of 1-carboxyl group of $\alpha$ KG are presented on the black dashed lines. ....                                                        | 4 |
| <b>Figure S4.</b> Overall architecture of F <sub>2</sub> Y224-FtmOx1•Fe <sup>II</sup> (pdb entry 9J1I) shown as a functional dimer with one monomer color-coded based on secondary and surface structures (shown as stereo images). The iron centers are labelled as deep olive spheres. .... | 4 |
| <b>Figure S5.</b> The composite omit map of F <sub>2</sub> Y224-FtmOx1•Fe <sup>II</sup> metallo-center (pdb entry 9J1I) ( $2mF_o - DF_c$ ) at $1\sigma$ contour. The electron density around F <sub>2</sub> Y224 is shown in grey mesh. ....                                                  | 5 |
| <b>Figure S6.</b> Superimposition of F <sub>2</sub> Y224-FtmOx1•Co <sup>II</sup> • $\alpha$ KG (pdb entry 9J1H) complex with F <sub>2</sub> Y224-FtmOx1•Fe <sup>II</sup> • $\alpha$ KG (pdb entry 4Y5S) complex. ....                                                                         | 6 |
| <b>Figure S7.</b> Structural comparisons of the loops ( <sup>65</sup> ADKYPPHF <sup>72</sup> ) in different FtmOx1 crystal structures. ....                                                                                                                                                   | 6 |
| <b>Figure S8.</b> The proposed mechanistic models for F <sub>2</sub> Y224-FtmOx1- catalysis. ....                                                                                                                                                                                             | 7 |
| Supplementary Tables.....                                                                                                                                                                                                                                                                     | 8 |
| <b>Table S1.</b> Crystallographic data collection and refinement statistics for the FtmOx1•Fe <sup>II</sup> structure. ....                                                                                                                                                                   | 8 |
| <b>Table S2.</b> Crystallographic data collection and refinement statistics for the FtmOx1•Co <sup>II</sup> • $\alpha$ KG binary complex. ....                                                                                                                                                | 9 |

## Supplementary Figures

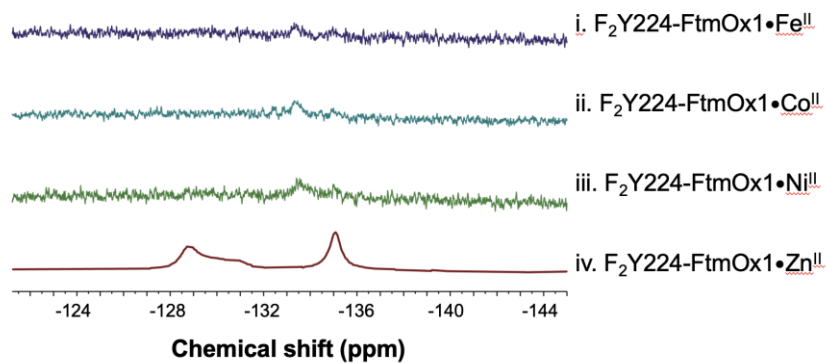

**Figure S1.**  $^{19}\text{F}$  NMR studies on F<sub>2</sub>Y224-FtmOx1 complexed with different metal ions.

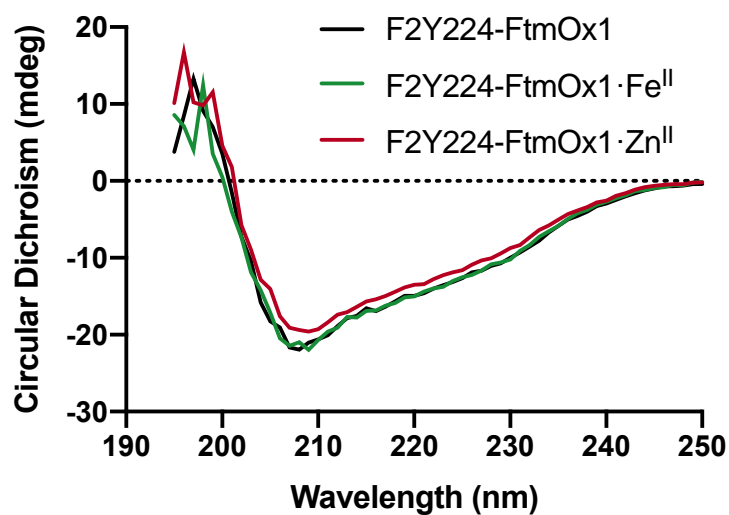

**Figure S2.** CD spectrum of F<sub>2</sub>Y224-FtmOx1 apo protein (black), F<sub>2</sub>Y224-FtmOx1•Fe(II) (red), and F<sub>2</sub>Y224-FtmOx1•Zn(II) (green).

## SUPPORTING INFORMATION

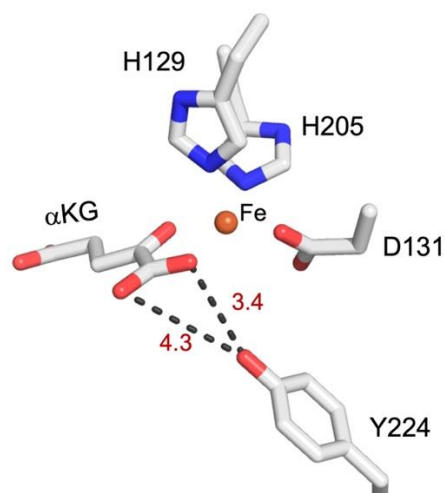

**Figure S3.** Binary structure of FtmOx1•Fe<sup>II</sup>•αKG (pdb entry 4Y5S) complex. The distances between Y224 and two oxygen atoms of 1-carboxyl group of αKG are presented on the black dashed lines.

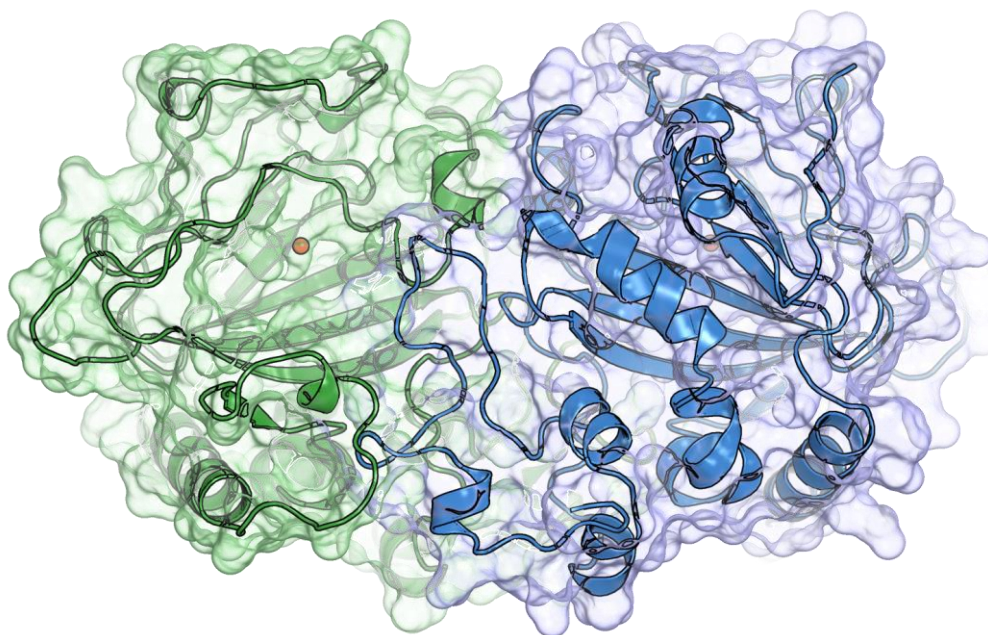

**Figure S4.** Overall architecture of F<sub>2</sub>Y224-FtmOx1•Fe<sup>II</sup> (pdb entry 9J1I) shown as a functional dimer with one monomer color-coded based on secondary and surface structures (shown as stereo images). The iron centers are labelled as deep olive spheres.

## SUPPORTING INFORMATION

---

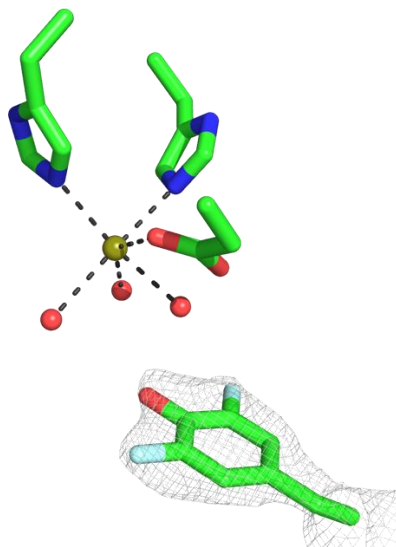

**Figure S5.** The composite omit map of F<sub>2</sub>Y224-FtmOx1•Fe<sup>II</sup> metallo-center (pdb entry 9J11) ( $2mFo - DFc$ ) at  $1\sigma$  contour. The electron density around F2Y224 is shown in grey mesh.

## SUPPORTING INFORMATION

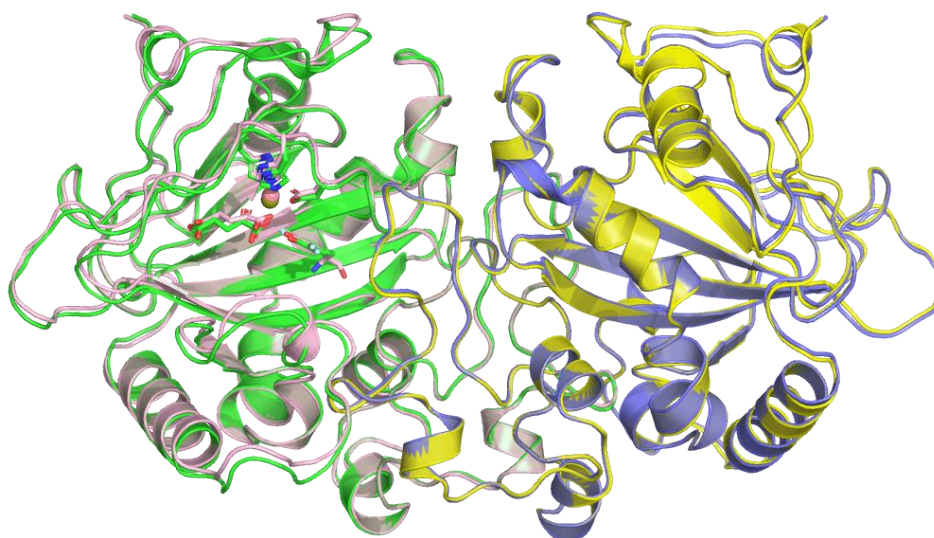

**Figure S6.** Superimposition of F<sub>2</sub>Y224-FtmOx1•Co<sup>II</sup>•αKG (pdb entry 9J1H) complex with F<sub>2</sub>Y224-FtmOx1•Fe<sup>II</sup>•αKG (pdb entry 4Y5S) complex.

The F<sub>2</sub>Y224-FtmOx1•Co<sup>II</sup>•αKG overall architecture and metallo-center are shown in green and purple cartoon and green sticks, respectively. The F<sub>2</sub>Y224-FtmOx1•Fe<sup>II</sup>•αKG overall architecture and metallo-center are shown in pink and yellow cartoon and sticks, respectively.

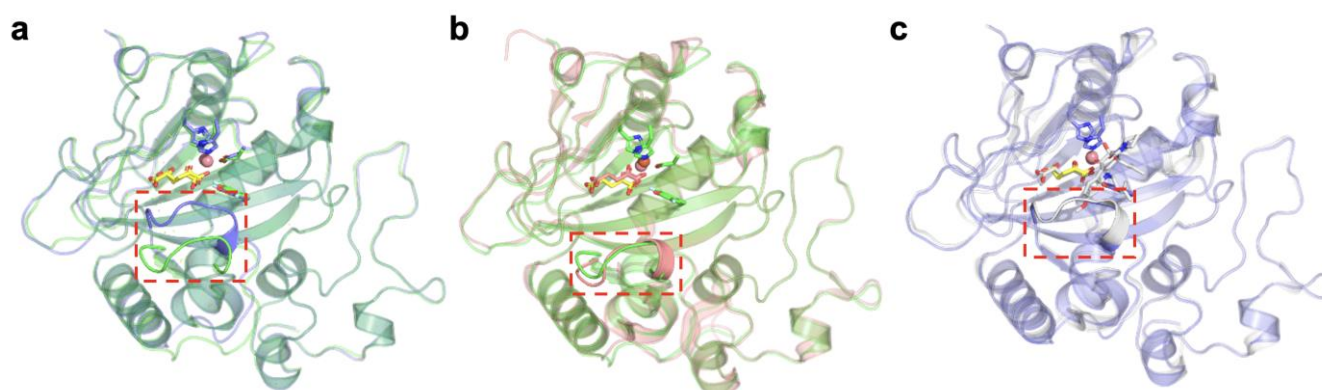

**Figure S7.** Structural comparisons of the loops (<sup>65</sup>ADKYPPHF<sup>72</sup>) in different FtmOx1 crystal structures.

(a) Superimposition of chain A (green) onto chain B (purple) of F<sub>2</sub>Y224-FtmOx1•Co<sup>II</sup>•αKG (pdb entry 9J1H) complex. (b) Superimposition of chain A (green) of F<sub>2</sub>Y224-FtmOx1•Co<sup>II</sup>•αKG with FtmOx1•Fe<sup>II</sup>•αKG (pdb entry 4Y5S) complex. (c) Superimposition of chain B (purple) of F<sub>2</sub>Y224-FtmOx1•Co<sup>II</sup>•αKG with FtmOx1•Co<sup>II</sup>•αKG•13-oxo-fumitremorgin B (**6**) (pdb entry 7WSB) complex. The structures were shown in cartoon mode with 75% transparency while structurally different loops (<sup>65</sup>ADKYPPHF<sup>72</sup>) are highlighted by red-dotted squares with no transparency.

# SUPPORTING INFORMATION

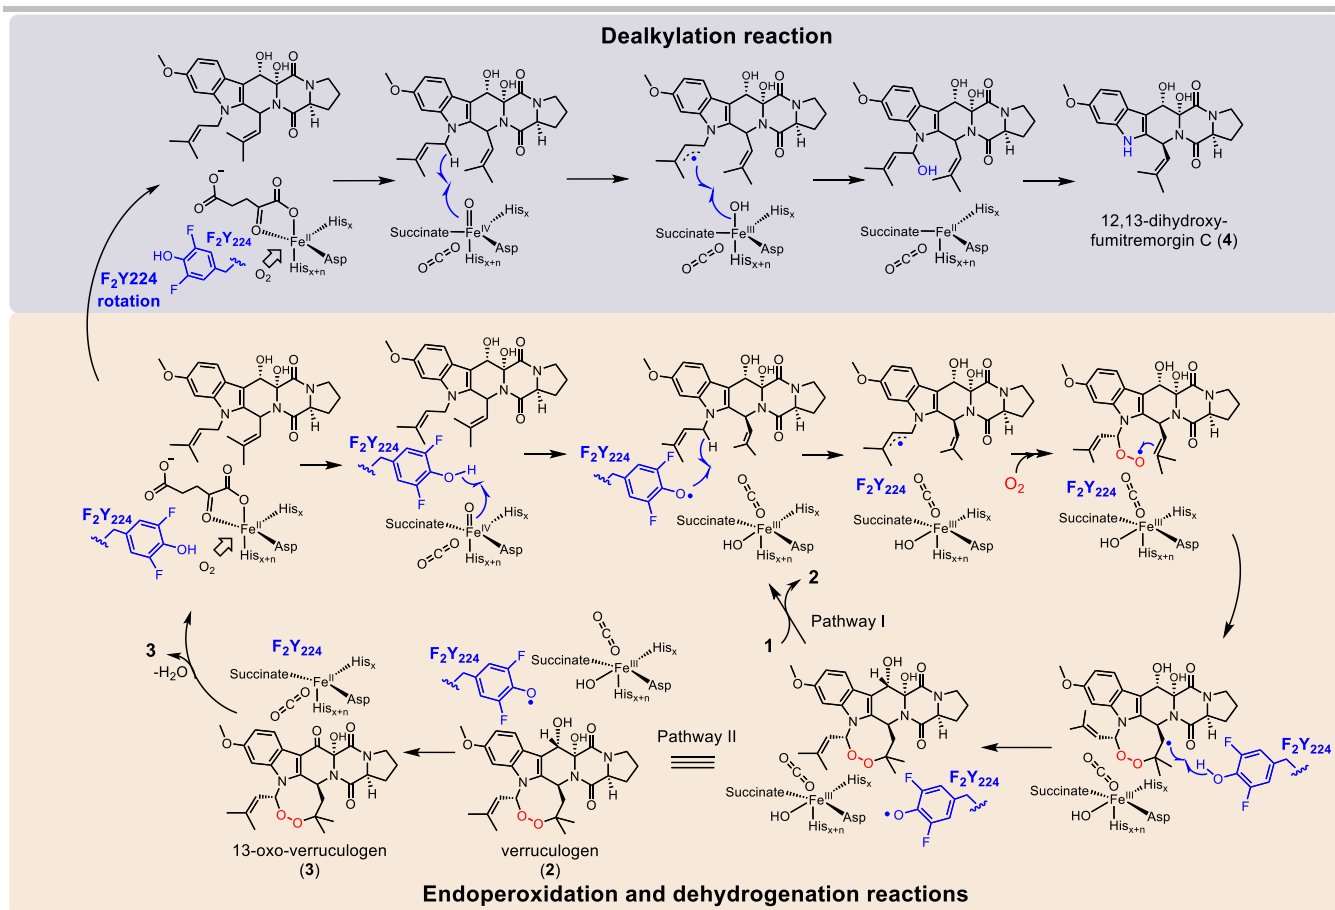

## SUPPORTING INFORMATION

### Supplementary Tables

**Table S1.** Crystallographic data collection and refinement statistics for the FtmOx1•Fe<sup>II</sup> structure.

| Data Collection                                                                                    |                                    |
|----------------------------------------------------------------------------------------------------|------------------------------------|
| Wavelength (Å)                                                                                     | 0.9785                             |
| Resolution range (Å)                                                                               | 36.08 - 2.11 (2.19 - 2.11)         |
| Space group                                                                                        | P 1 2 <sub>1</sub> 1               |
| Unit cell<br>a, b, c (Å)<br>$\alpha, \beta, \gamma$ (°)                                            | 60.44 45.61 105.15<br>90 100.02 90 |
| Unique reflections                                                                                 | 32539 (3155)                       |
| Multiplicity                                                                                       | 3.2 (2.6)                          |
| Completeness (%)                                                                                   | 99.16 (97.23)                      |
| Mean I/sigma(I)                                                                                    | 11.18 (1.79)                       |
| CC <sub>1/2</sub>                                                                                  | 0.997 (0.686)                      |
| R <sub>sym</sub>                                                                                   | 0.069 (0.536)                      |
| Refinement                                                                                         |                                    |
| R <sub>work</sub>                                                                                  | 0.1746 (0.2312)                    |
| R <sub>free</sub>                                                                                  | 0.2146 (0.2739)                    |
| Number of non-hydrogen atoms                                                                       | 4726                               |
| macromolecules                                                                                     | 4501                               |
| ligands                                                                                            | 3                                  |
| water                                                                                              | 222                                |
| Protein residues                                                                                   | 569                                |
| RMS bonds (Å)                                                                                      | 0.008                              |
| RMS angles (°)                                                                                     | 0.88                               |
| Ramachandran favored (%)                                                                           | 98.39                              |
| Ramachandran outliers (%)                                                                          | 0                                  |
| Average B-factor (Å <sup>2</sup> )                                                                 | 41.12                              |
| macromolecules                                                                                     | 41.17                              |
| ligands                                                                                            | 39.80                              |
| solvent                                                                                            | 40.28                              |
| <sup>1</sup> Statistics for the highest-resolution shell are shown in parentheses.                 |                                    |
| <sup>2</sup> R <sub>free</sub> is calculated with 5% of the data randomly omitted from refinement. |                                    |



## SUPPORTING INFORMATION

**Table S2.** Crystallographic data collection and refinement statistics for the FtmOx1•Co<sup>II</sup>•αKG binary complex.

| Data Collection                                                                                    |                                                |
|----------------------------------------------------------------------------------------------------|------------------------------------------------|
| Wavelength (Å)                                                                                     | 0.9785                                         |
| Resolution range (Å)                                                                               | 47.93 - 2.00 (2.07 - 2.00)                     |
| Space group                                                                                        | P 2 <sub>1</sub> 2 <sub>1</sub> 2 <sub>1</sub> |
| Unit cell<br>a, b, c (Å)<br>α, β, γ (°)                                                            | 62.032 62.077 151.02<br>90 90 90               |
| Unique reflections                                                                                 | 39836 (3641)                                   |
| Multiplicity                                                                                       | 5.9 (3.7)                                      |
| Completeness (%)                                                                                   | 99.04 (91.92)                                  |
| Mean I/sigma(I)                                                                                    | 9.28 (1.99)                                    |
| CC <sub>1/2</sub>                                                                                  | 0.992 (0.846)                                  |
| R <sub>sym</sub>                                                                                   | 0.118 (0.470)                                  |
| Refinement                                                                                         |                                                |
| R <sub>work</sub>                                                                                  | 0.1726 (0.2505)                                |
| R <sub>free</sub>                                                                                  | 0.1939 (0.2932)                                |
| Number of non-hydrogen atoms                                                                       | 4919                                           |
| macromolecules                                                                                     | 4466                                           |
| ligands                                                                                            | 33                                             |
| water                                                                                              | 420                                            |
| Protein residues                                                                                   | 565                                            |
| RMS bonds (Å)                                                                                      | 0.007                                          |
| RMS angles (°)                                                                                     | 0.98                                           |
| Ramachandran favored (%)                                                                           | 95.66                                          |
| Ramachandran outliers (%)                                                                          | 0.36                                           |
| Average B-factor (Å <sup>2</sup> )                                                                 | 31.68                                          |
| macromolecules                                                                                     | 31.53                                          |
| ligands                                                                                            | 31.71                                          |
| solvent                                                                                            | 33.24                                          |
| <sup>1</sup> Statistics for the highest-resolution shell are shown in parentheses.                 |                                                |
| <sup>2</sup> R <sub>free</sub> is calculated with 5% of the data randomly omitted from refinement. |                                                |
